# Supplementary material
Source: PubMed Central journal article supplement (PMC9061814)
Supplement: 41422_2022_616_MOESM3_ESM.pdf [file 41422_2022_616_MOESM3_ESM.pdf]

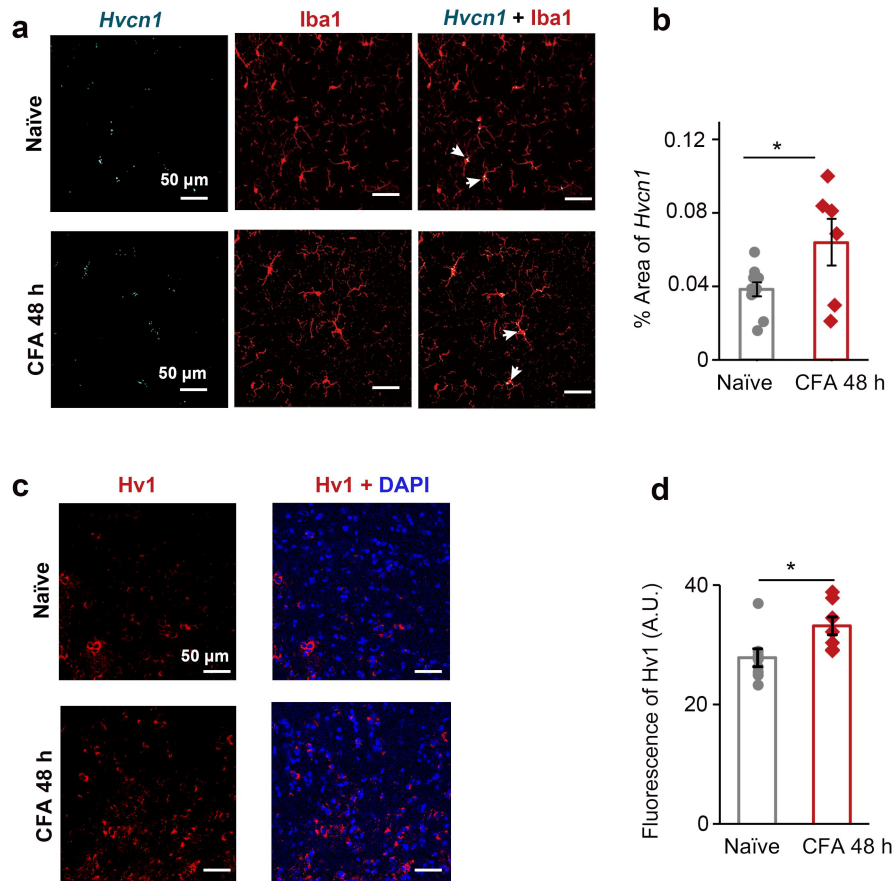

**Fig. S3. Distributions of Hv1 in spinal cord.** **a** Typical RNAscope images for *Hvcn1* and IHC images for *Iba1* expression in spinal cord in naïve mice and CFA model. **b** Quantifications for *Hvcn1* expression in spinal cord in naïve and CFA mice (n = 6 sections from 3 mice, two sample *t* test). **c, d** Typical IHC images and quantifications for *Hv1* in spinal cord in naïve mice and CFA model (n = 7-8 sections from 3 mice, two sample *t* test). Data in **(b and d)** are shown as mean  $\pm$  SEM. \**P* < 0.05.
