# Supplementary material
Source: PubMed Central journal article supplement (PMC9061814)
Supplement: 41422_2022_616_MOESM6_ESM.pdf [file 41422_2022_616_MOESM6_ESM.pdf]

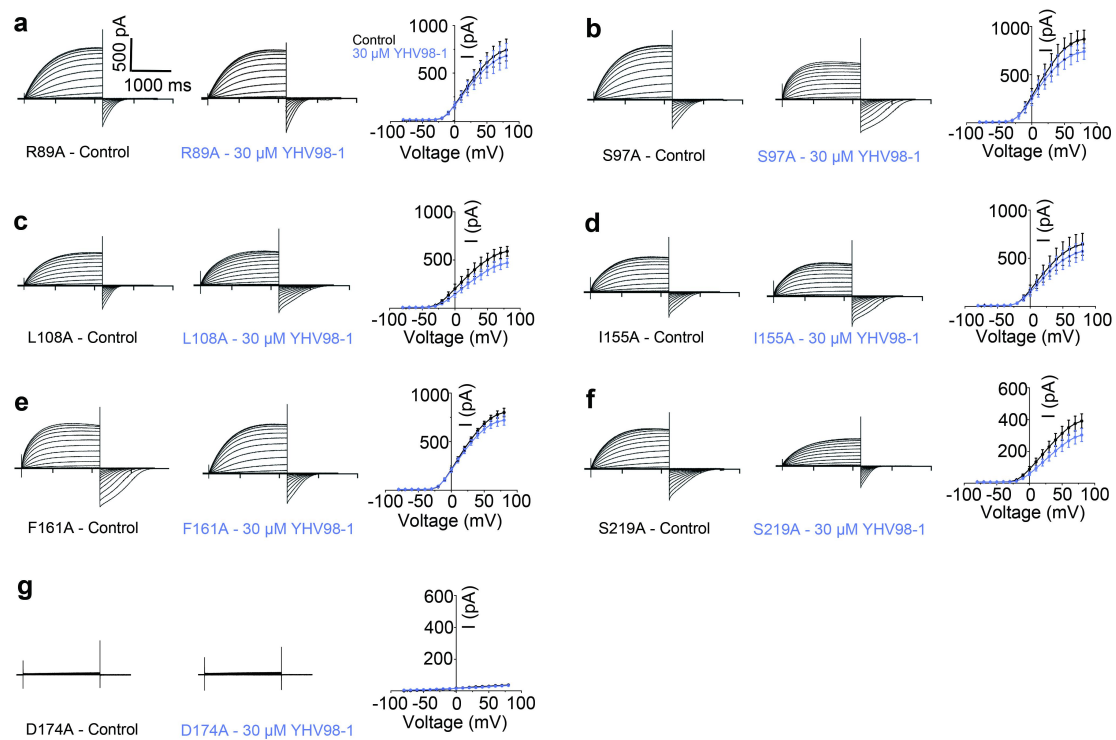

**Fig. S6. Effects of YHV98-1 on Hv1 mutants.** Typical traces of whole-cell recordings and corresponding I-V curves showing the effect of YHV98-1 on Hv1 mutants (a) R89A, (b) S97A, (c) L108A, (d) I155A, (e) F161A, (f) S219A and (g) D174A. Typical traces of whole-cell recordings are shown and corresponding I-V curves are shown. From a holding potential of -60 mV, 2 seconds test pulses to membrane potentials of -80 mV to +80 mV were applied in 10-mV increments.  $\text{pH}_{\text{in}}$  and  $\text{pH}_{\text{out}}$  were 6.0 and 7.2, respectively.
