# Supplementary material
Source: PubMed Central journal article supplement (PMC9061814)
Supplement: 41422_2022_616_MOESM8_ESM.pdf [file 41422_2022_616_MOESM8_ESM.pdf]

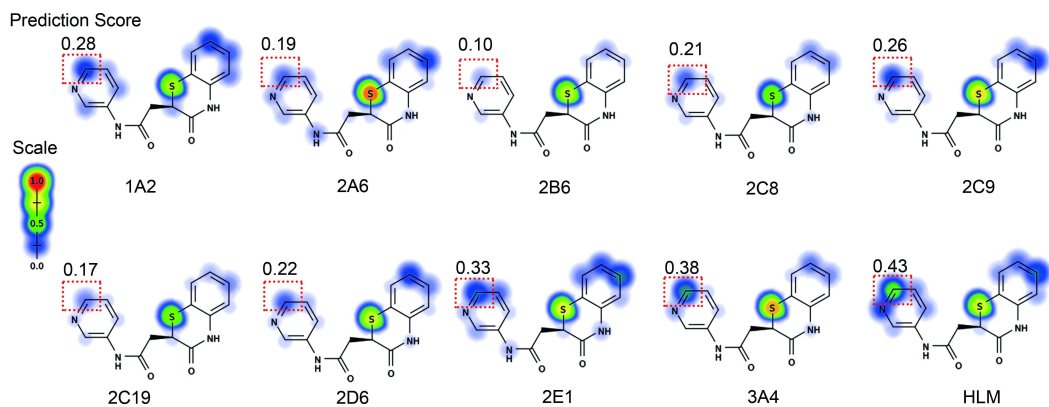

**Fig. S8. CYP-mediated metabolism sites of YHV98-1 predicted by the XenoSite server.**

Blue corresponds to a zero probability of metabolism and red corresponds to a probability of 1.0, and the letter labeling under each molecule represent the probability score of being metabolized by specific CYP isozyme.
