# Supplementary material
Source: PubMed Central journal article supplement (PMC9061814)
Supplement: 41422_2022_616_MOESM9_ESM.pdf [file 41422_2022_616_MOESM9_ESM.pdf]

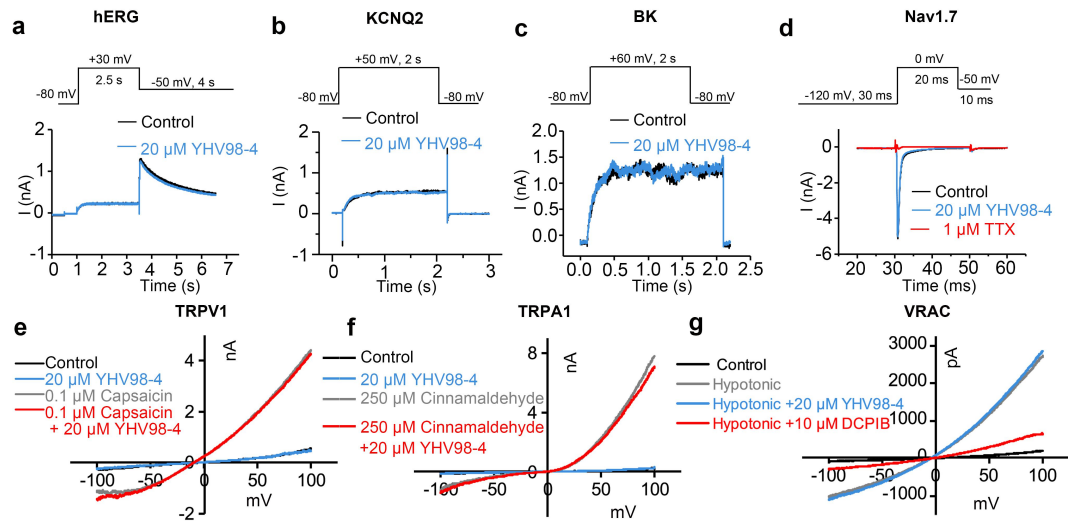

**Fig. S9. Effects of YHV98-4 on several ion channels. (a) hERG, (b) KCNQ2, (c) BK, (d) Nav1.7, (e) TRPV1 (f) TRPA1 and (g) VRAC channels.** Typical traces of whole-cell recordings are shown. For the tests on TRPV1 and TRPA1, TRPV1 activator capsaicin (0.1  $\mu$ M) and TRPA1 activator Cinnamaldehyde (250  $\mu$ M) were used references, respectively. For the test on VRAC channel, VRAC inhibitor DCPIB (10  $\mu$ M) was used references.
