# Supplementary material
Source: PubMed Central journal article supplement (PMC9061814)
Supplement: 41422_2022_616_MOESM10_ESM.pdf [file 41422_2022_616_MOESM10_ESM.pdf]

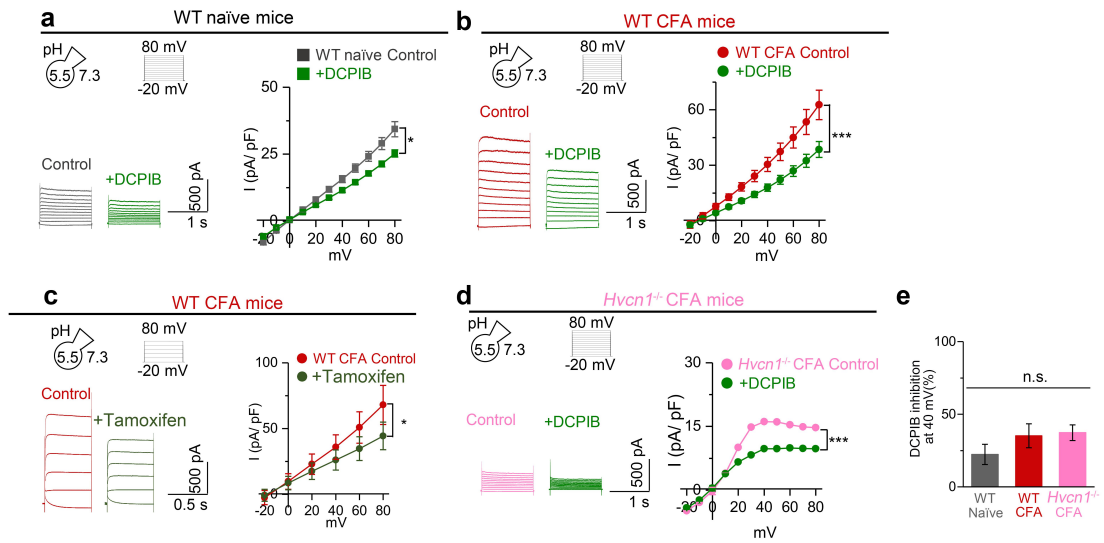

**Fig. S10.** VRAC-mediated currents in DRG neurons from WT naïve (a), WT CFA (b, c) or *Hvcn1*<sup>-/-</sup> CFA mice (d), and DCPIB inhibition rate (e) under different condition (n = 4-13 cells from at least 3 mice, two-way repeated measures ANOVA for a-d, one-way ANOVA followed by Dunnett's multiple comparisons test for e). All data are shown as mean ± SEM. n.s., not significant, \**P* < 0.05, \*\*\**P* < 0.001.
