# Supplementary material
Source: PubMed Central journal article supplement (PMC9061814)
Supplement: 41422_2022_616_MOESM11_ESM.pdf [file 41422_2022_616_MOESM11_ESM.pdf]

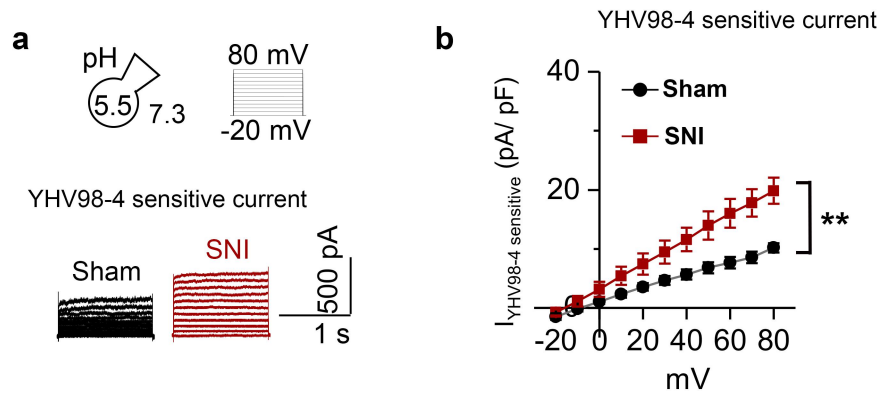

**Fig. S11. Hv1 currents in DRG neurons from SNI mice.** **a** typical whole-cell current traces and **b** current–voltage (I–V) relationships for  $Zn^{2+}$  sensitive current under SNI mice and sham mice ( $n = 6$  cells from 6 mice for SNI group,  $n = 8$  cells from 8 mice for Sham group, two-way repeated measures ANOVA). Data in **(b)** are shown as mean  $\pm$  SEM. **\*\*** $P < 0.01$ .
