# Supplementary material
Source: PubMed Central journal article supplement (PMC9061814)
Supplement: 41422_2022_616_MOESM12_ESM.pdf [file 41422_2022_616_MOESM12_ESM.pdf]

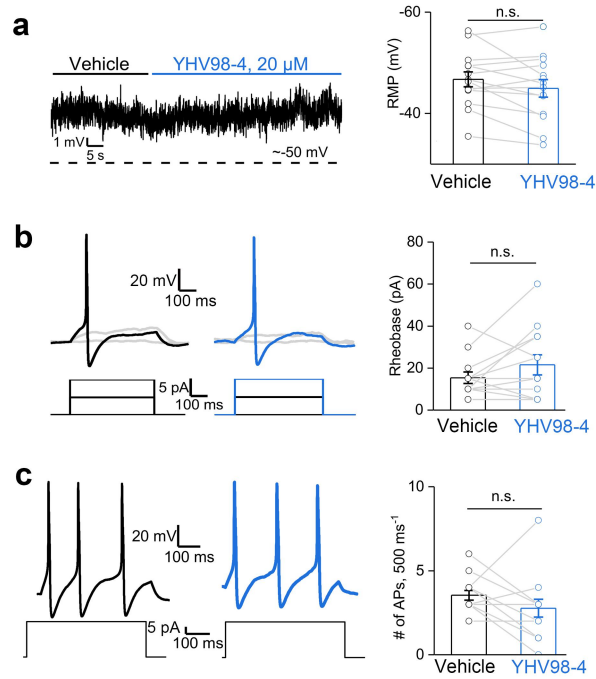

**Fig. S12. Functional roles of YHV98-4 on the resting membrane potential or the action potential firing properties in DRG neurons. a** Representative traces and scatter plots showing the effects of vehicle, or YHV98-4 (20  $\mu$ M) on resting membrane potential (RMP) changes (n = 14 cells for control and YHV98-4 from 8 mice, paired *t* test). **b, c** Traces and bar graph showing the effects of YHV98-4 on rheobase and firing frequency in DRG neurons (n = 13 cells from 8 mice, paired *t* test). All data are shown as mean  $\pm$  SEM. n.s., not significant.
