# Supplementary material
Source: PubMed Central journal article supplement (PMC9061814)
Supplement: 41422_2022_616_MOESM13_ESM.pdf [file 41422_2022_616_MOESM13_ESM.pdf]

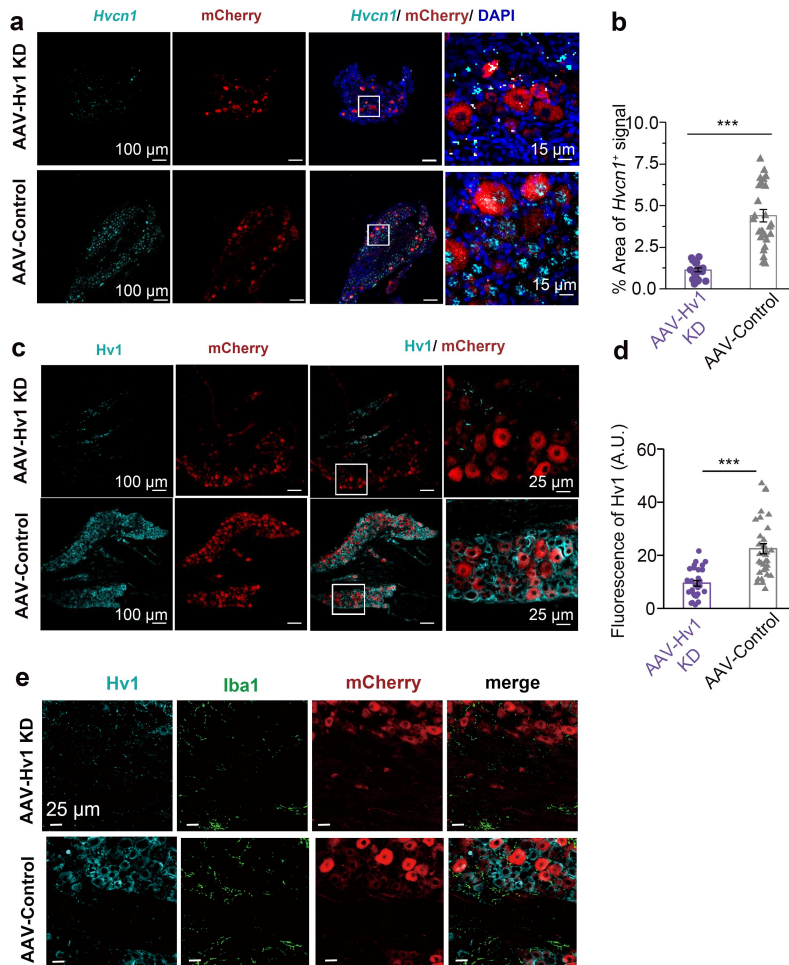

**Fig. S13. Hv1 expression levels in *Hvcn1* knockdown mice. a, b** Typical RNAscope images and quantifications showing *Hvcn1* expression in AAV-Hv1 KD mouse DRG neurons in comparison to AAV-Control mouse DRG neurons ( $n = 20-26$  sections from 9 mice, two sample  $t$  test). **c, d** Typical IHC images and quantifications showing Hv1 expression in AAV-Hv1 KD mouse DRG neurons in comparison to AAV-Control mouse DRG neurons ( $n = 31-33$  sections from 9-10 mice, Mann-Whitney tests). **e** IHC images showing the co-localization of Hv1 with Iba1 in DRG in AAV-Hv1 KD mice and AAV-Control mice. Data in **(b and d)** are shown as mean  $\pm$  SEM.  $**P < 0.01$ ,  $***P < 0.001$ .
