# Supplementary material
Source: PubMed Central journal article supplement (PMC9061814)
Supplement: 41422_2022_616_MOESM15_ESM.pdf [file 41422_2022_616_MOESM15_ESM.pdf]

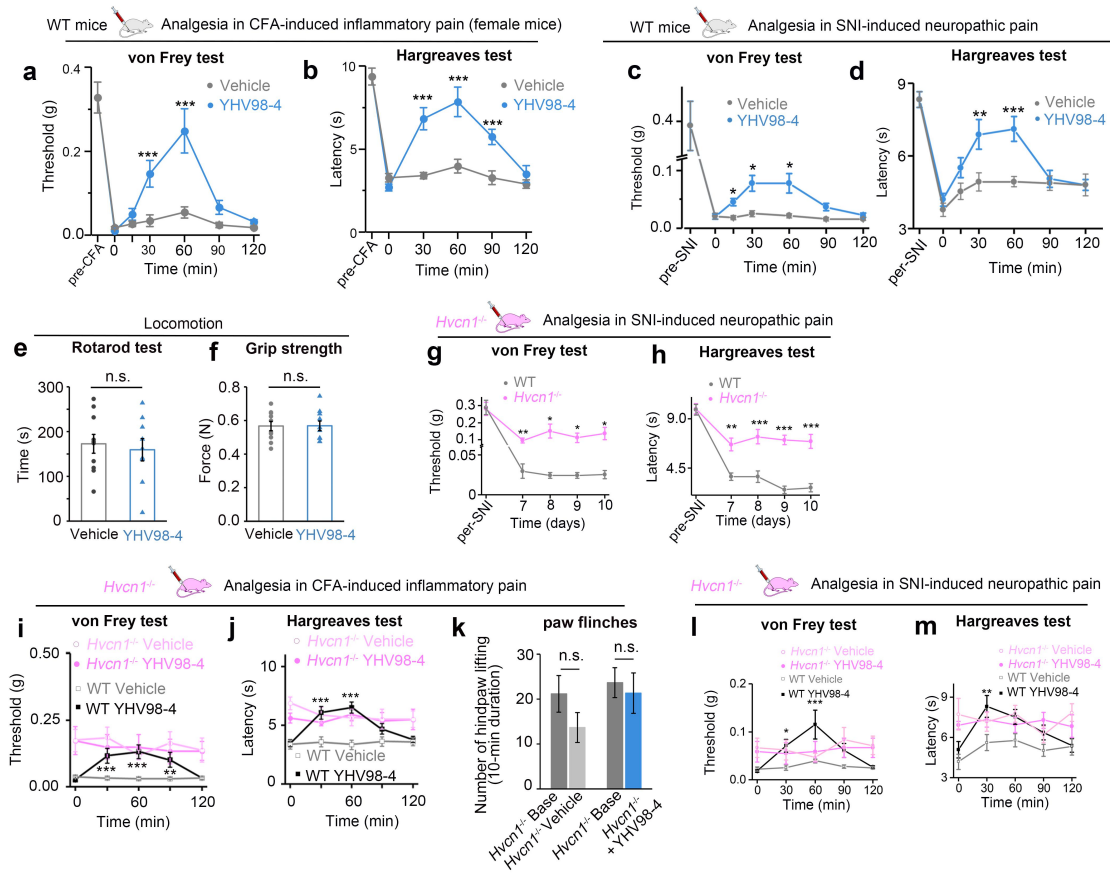

**Fig. S15. Effects of systemic administration of YHV98-4 (10 mg/kg, i.p.) in CFA or SNI mice**

**a,b** Time courses for the analgesic effects of YHV98-4 (10 mg/kg) on mechanical allodynia (**a**) and heat hyperalgesia (**b**) in CFA induced chronic inflammatory pain female mice (n = 10, female mice, two way repeated-measures ANOVA followed by Sidak's multiple comparisons test.). **c,d** Time courses for the effects of YHV98-4 on mechanical allodynia (**c**), and heat hyperalgesia (**d**) in SNI induced neuropathic pain mice (n = 9-13, Two way repeated-measures ANOVA followed by Sidak's multiple comparisons test.). **e** Rotarod test in mice after injection of vehicle or YHV98-4 (n = 10, two sample *t* test). **f** Grip strength test in mice treated with vehicle or with YHV98-4 (n = 9-10, two sample *t* test). **g,h** Basal mechanical allodynia and thermal hyperalgesia under SNI in WT or *Hvcn1*<sup>-/-</sup> mice (n = 7-16, Two way repeated-measures ANOVA followed by Sidak's multiple comparisons test.). **i-k**

Analgesic effect of YHV98-4 in WT or *Hvcn1*<sup>-/-</sup> mice under CFA condition (n = 6-13, Two way repeated-measures ANOVA followed by Sidak's multiple comparisons test or two sample *t* test.). **l,m** Analgesic effect of YHV98-4 under SNI in WT or *Hvcn1*<sup>-/-</sup> mice (n = 6-12, Two way repeated-measures ANOVA followed by Sidak's multiple comparisons test.). The effects of YHV98-4 (i.p.) on mechanical allodynia was measured at day 7 to day 8, and on heat hyperalgesia was measured at day 9 to day 10. All data are shown as mean ± SEM. n.s., not significant, \**P* < 0.05, \*\**P* < 0.01, \*\*\**P* < 0.001.
