# Supplementary material
Source: PubMed Central journal article supplement (PMC9061814)
Supplement: 41422_2022_616_MOESM16_ESM.pdf [file 41422_2022_616_MOESM16_ESM.pdf]

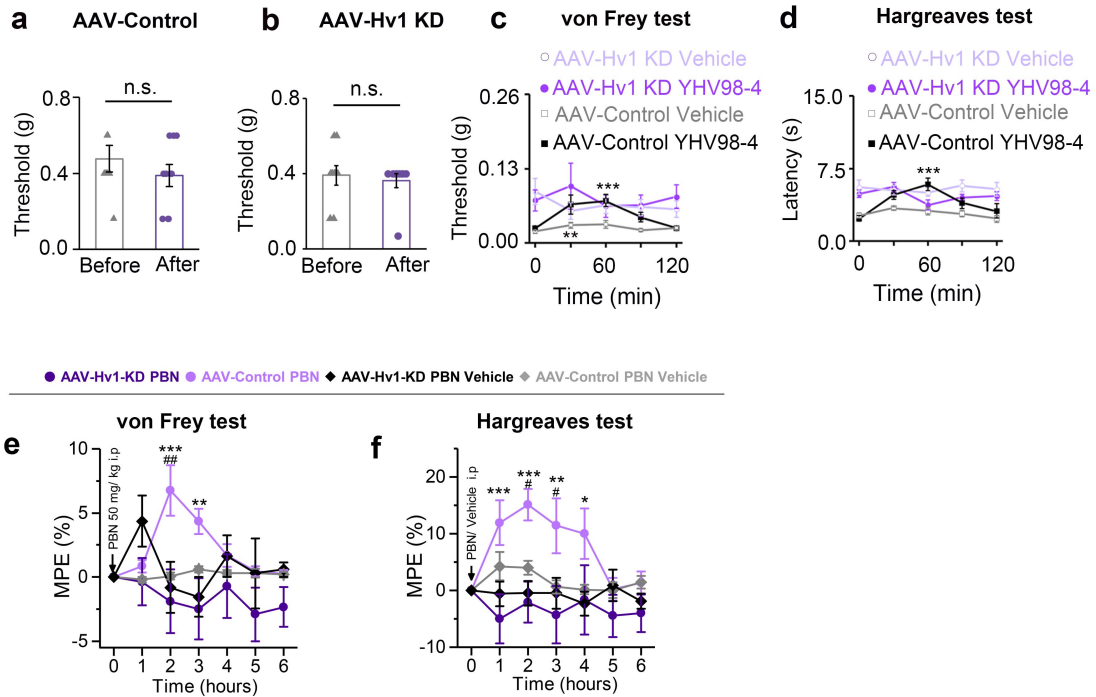

**Fig. S16. Analgesic effects of YHV98-4 or PBN in AAV-Hv1 KD mice.** **a, b** Mechanical threshold tested before and after DRG virus microinjection in AAV-Hv1 KD mice in comparison to AAV-Control mice (n = 9-10, Mann-Whitney tests). **c, d** Analgesic effect of YHV98-4 in AAV-Hv1 KD or AAV-Control mice (n = 9-10, Two way repeated-measures ANOVA followed by Sidak's multiple comparisons test.). **e, f** Time courses for the analgesic effects of PBN (50 mg/kg, i.p.) on mechanical allodynia (**e**) and heat hyperalgesia (**f**) in CFA induced chronic inflammatory pain (n= 8-9 mice, two way repeated-measures ANOVA followed Tukey's multiple comparisons test. \* AAV-Hv1-KD PBN vs AAV-Control PBN, # AAV-Control PBN vs AAV-Hv1-KD PBN Vehicle). The maximal possible effect (MPE) (%) value was calculated to compare the antinociceptive effects.  $MPE (\%) = 100 \times [(post\ drug\ value - baseline\ value) / (cutoff\ value - baseline\ value)]$  (the cutoff value of von Frey test was

2 g, and was 20 s in Hargreaves test). All data are shown as mean  $\pm$  SEM. n.s., not significant,

\* $P < 0.05$ , \*\* $P < 0.01$ , \*\*\* $P < 0.001$ . # $P < 0.05$ , ## $P < 0.01$ , ### $P < 0.001$ .
