# Supplementary material
Source: PubMed Central journal article supplement (PMC9061814)
Supplement: 41422_2022_616_MOESM17_ESM.pdf [file 41422_2022_616_MOESM17_ESM.pdf]

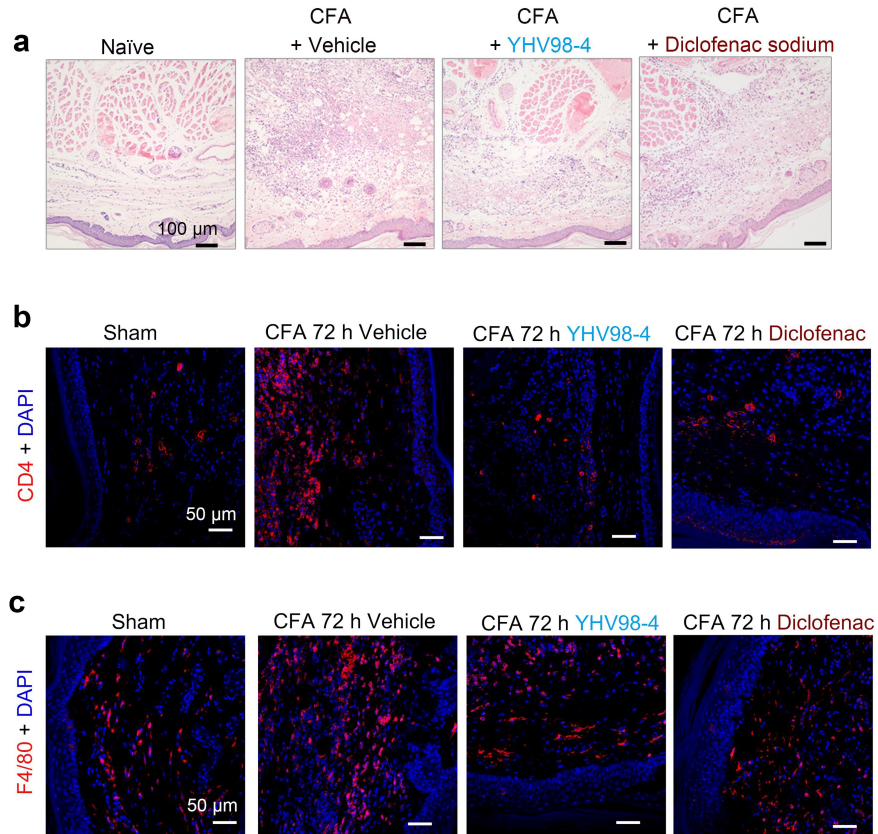

**Fig. S17.** Typical H&E staining images (a) and IHC images of CD4<sup>+</sup> cells (b) or F4/80<sup>+</sup> cells (c) *in situ* expressions from foot skin sections in different conditions.
