# Supplementary material
Source: PubMed Central journal article supplement (PMC9061814)
Supplement: 41422_2022_616_MOESM18_ESM.pdf [file 41422_2022_616_MOESM18_ESM.pdf]

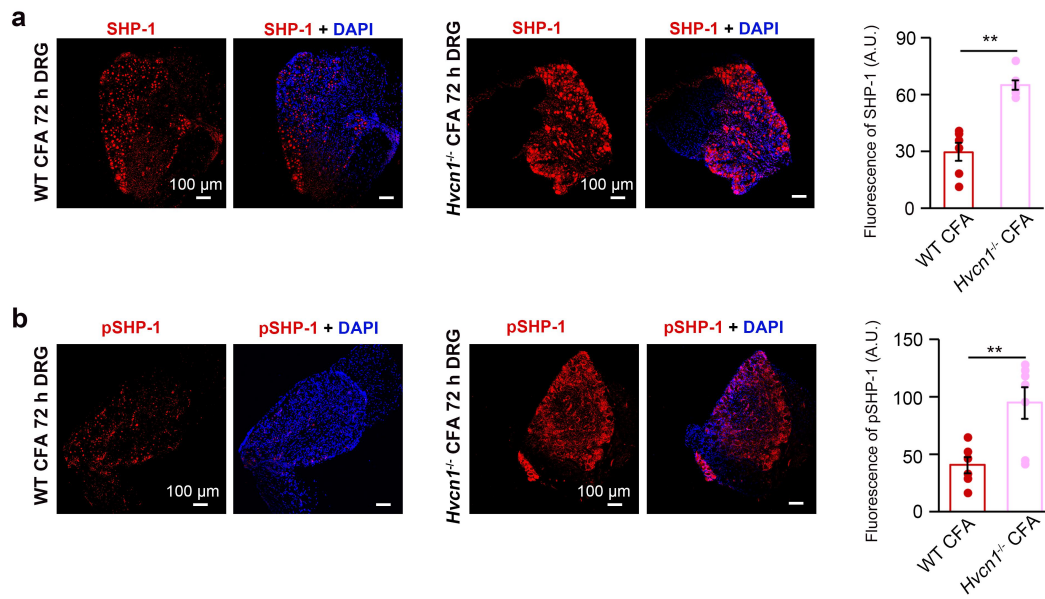

**Fig. S18.** IHC images and quantifications for SHP-1 (a) and pSHP-1 (b) *in situ* expressions from DRG sections in WT and *Hvcn1*<sup>-/-</sup> mice after CFA injection 72 hours (n = 6-7 sections from 3 mice, Mann-Whitney test or two sample *t* test). All data are shown as mean ± SEM. \*\**P* < 0.01.
