# Supplementary material
Source: PubMed Central journal article supplement (PMC9061814)
Supplement: 41422_2022_616_MOESM19_ESM.pdf [file 41422_2022_616_MOESM19_ESM.pdf]

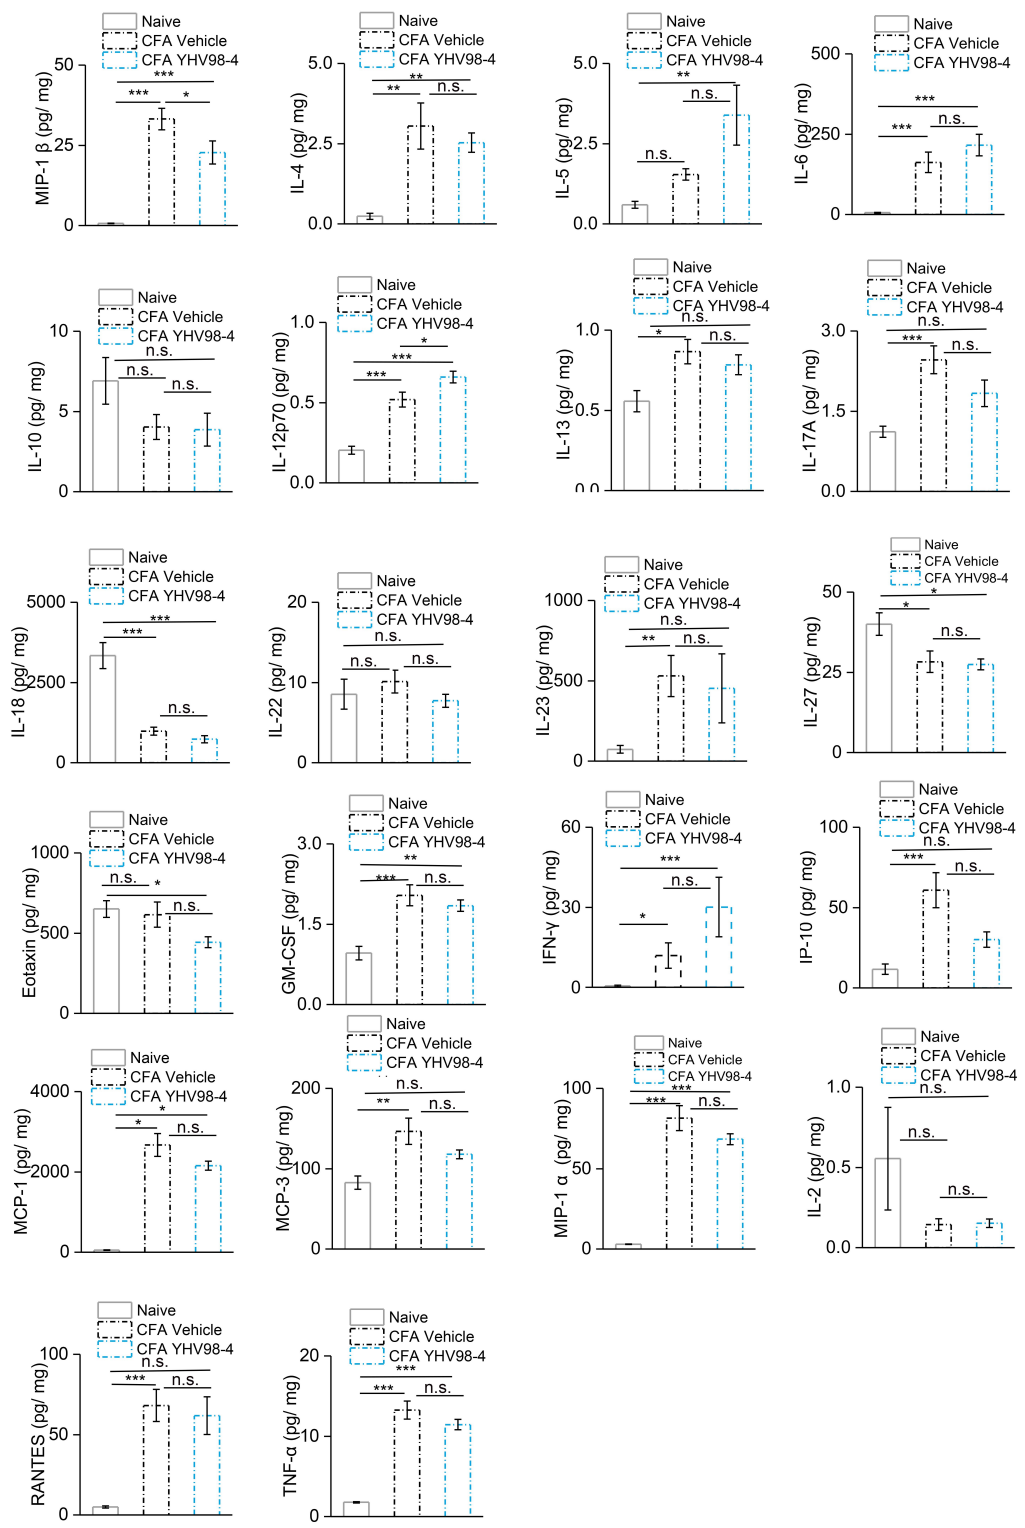

**Fig. S19. Quantifications for release of cytokines and chemokines in hind paw skins of CFA mice treated with or without YHV98-4 (n = 8, Kruskal-Wallis test followed by Dunn's multiple comparisons test or one-way ANOVA followed by Tukey's multiple comparison test).**
