# Supplementary material
Source: PubMed Central journal article supplement (PMC9061814)
Supplement: 41422_2022_616_MOESM20_ESM.pdf [file 41422_2022_616_MOESM20_ESM.pdf]

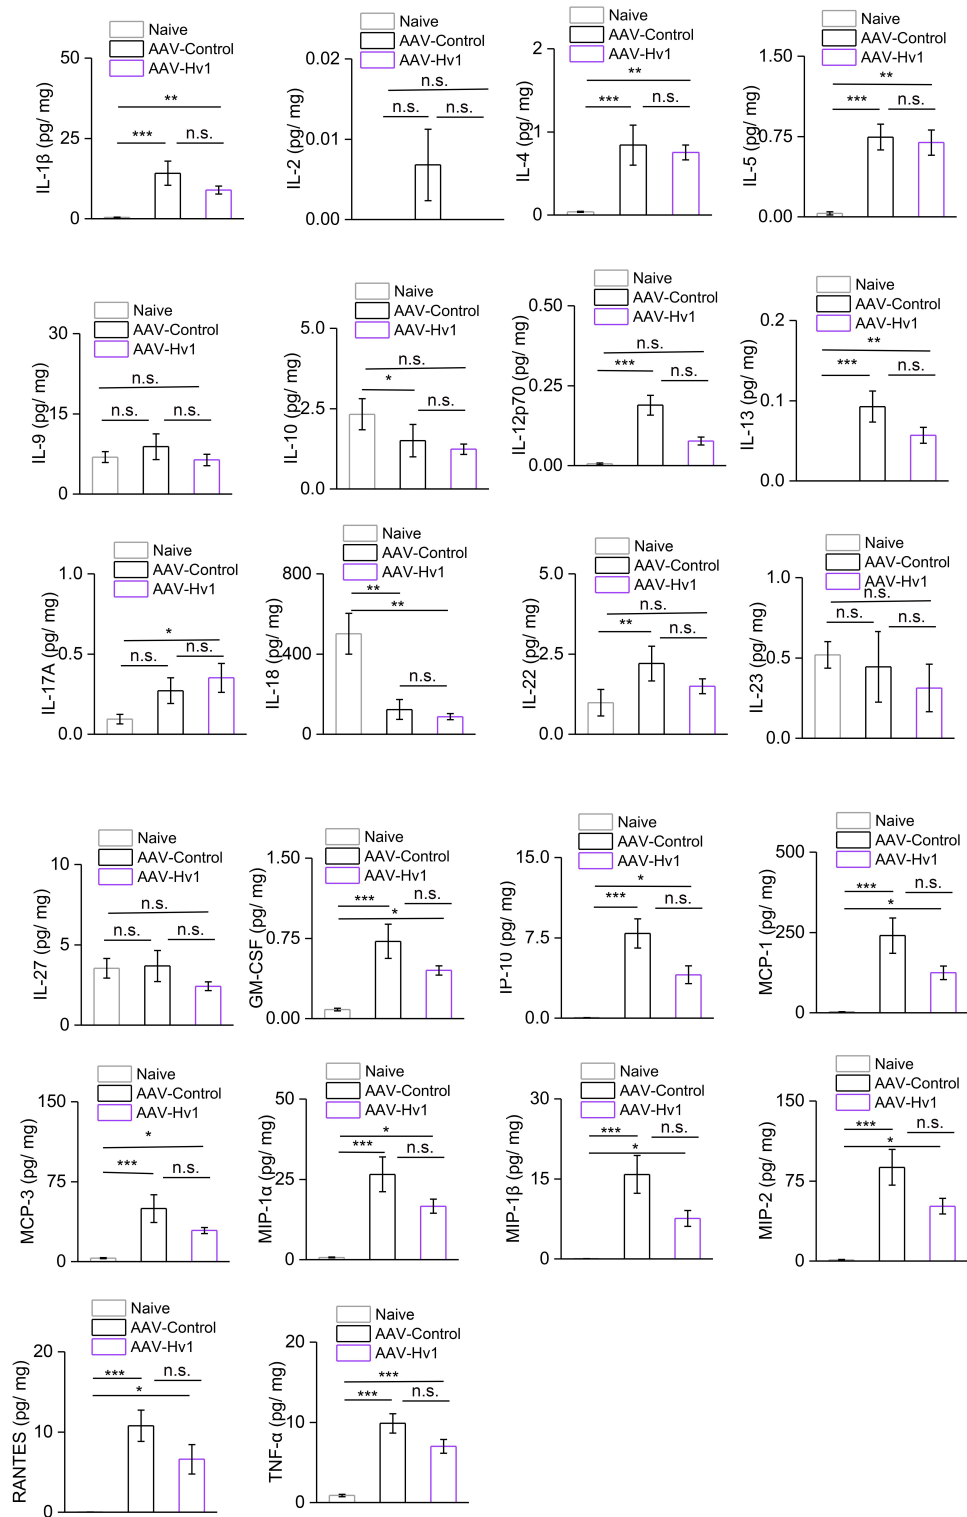

**Fig. S20. Quantifications for release of cytokines and chemokines in hind paw skins of AAV-Hv1 KD mice and AAV-Control mice under CFA condition (n = 8, Kruskal-Wallis test followed by Dunn's multiple comparisons test or one-way ANOVA followed by Tukey's multiple comparison test).**
