# Supplementary material
Source: PubMed Central journal article supplement (PMC9061814)
Supplement: 41422_2022_616_MOESM21_ESM.pdf [file 41422_2022_616_MOESM21_ESM.pdf]

**Supplementary Table S1. Pharmacokinetic profile in plasma and brain of C57BL/6 mice (n = 5) after a single intraperitoneal dose (10 mg/kg) of YHV98-1 or YHV98-4.**

| <b>Compound</b>               | <b>YHV98-1</b>       |              | <b>YHV98-4</b>       |              |
|-------------------------------|----------------------|--------------|----------------------|--------------|
| <b>Dose</b>                   | <b>i.p. 10 mg/kg</b> |              | <b>i.p. 10 mg/kg</b> |              |
| <b>Tissue</b>                 | <b>Plasma</b>        | <b>Brain</b> | <b>Plasma</b>        | <b>Brain</b> |
| T <sub>1/2</sub> (hour)       | 0.82                 | 0.68         | 1.75                 | 2.13         |
| T <sub>max</sub> (hour)       | 0.083                | 0.25         | 0.083                | 0.5          |
| C <sub>max</sub> (ng/ml)      | 3745.99              | 628.23       | 4464.83              | 3077.14      |
| AUC <sub>0-∞</sub> (hr*ng/ml) | 3266.55              | 649.66       | 3644.92              | 5089.99      |
| AUC <sub>0-t</sub> (hr*ng/ml) | 3262.44              | 647.35       | 3526.91              | 4704.36      |
| Cl (ml/min/kg)                | 51.02                | 256          | 45.54                | 32.74        |
| MRT <sub>0-t</sub> (h)        | 0.62                 | 0.80         | 1.27                 | 1.85         |
| Brain/Plasma ratio (%)        | NA                   | 0.20         | NA                   | 1.33         |

Abbreviations: T<sub>1/2</sub>, terminal half-life; T<sub>max</sub>, time to maximum plasma concentration; C<sub>max</sub>, maximum plasma concentration; AUC, area under the plasma concentration–time curve; CL, clearance; MRT, Mean Retention Time; NA, not applicable.
